# Supplementary material
Source: MDPI journal article supplement (https://www.mdpi.com/2075-4442/6/2/39)
Supplement: s1 [file s1]

## Supplementary Materials:

# Material Characterization and Influence of Sliding Speed and Pressure on Friction and Wear Behavior of Self-Lubricating Bearing Materials for Hydropower Applications

Maria Rodiouchkina, Kim Berglund, Johanne Mouzon, Fredrik Forsberg, Faiz Ullah Shah, Ilia Rodushkin and Roland Larsson

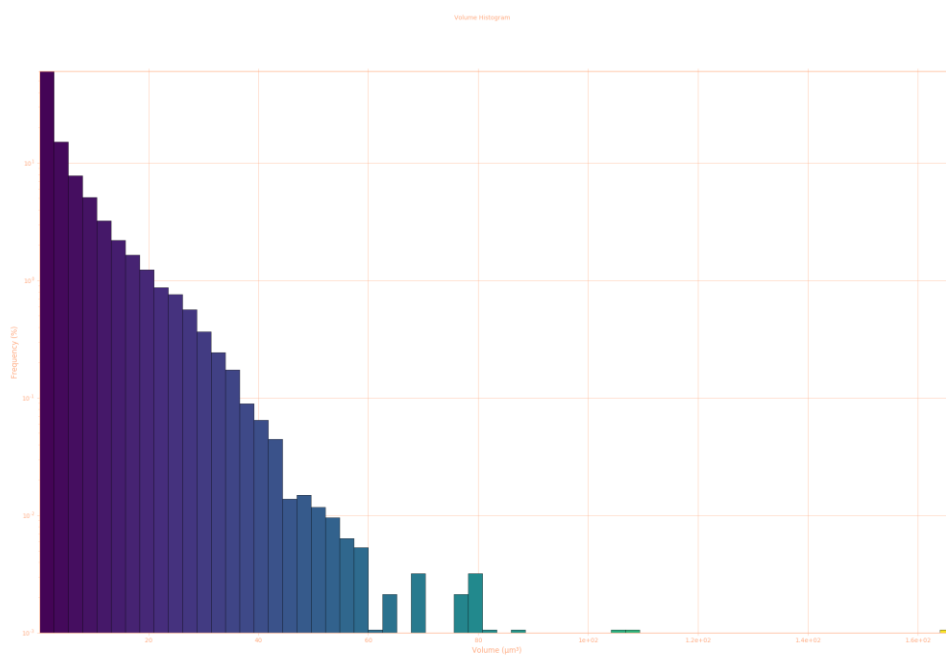

**Figure S1.** Volume distribution of pores in ThorPlas using 20× objective.

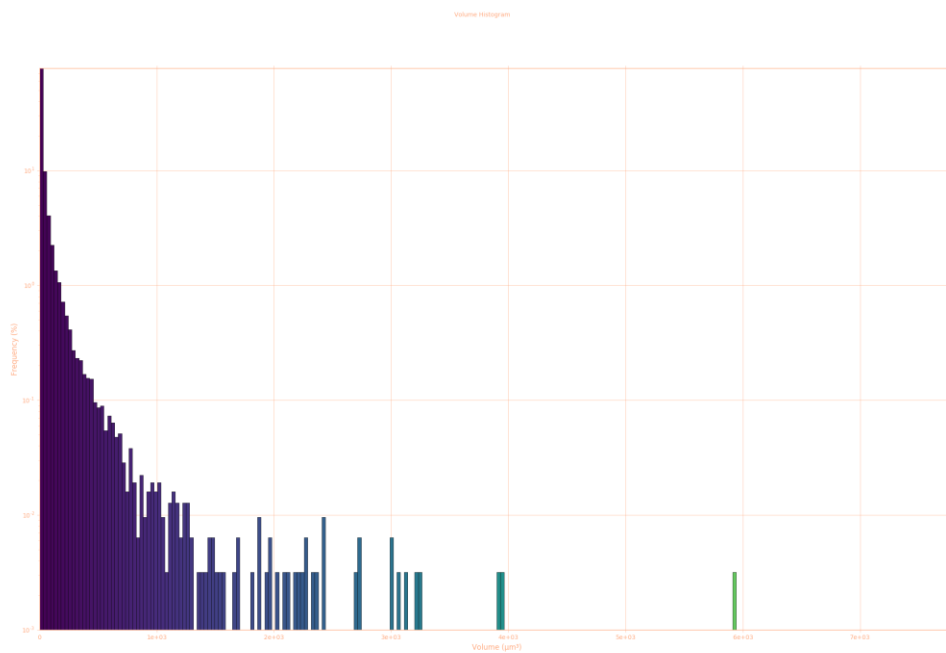

**Figure S2.** Volume distribution of spherical shaped particles in ThorPlas using 20× objective.

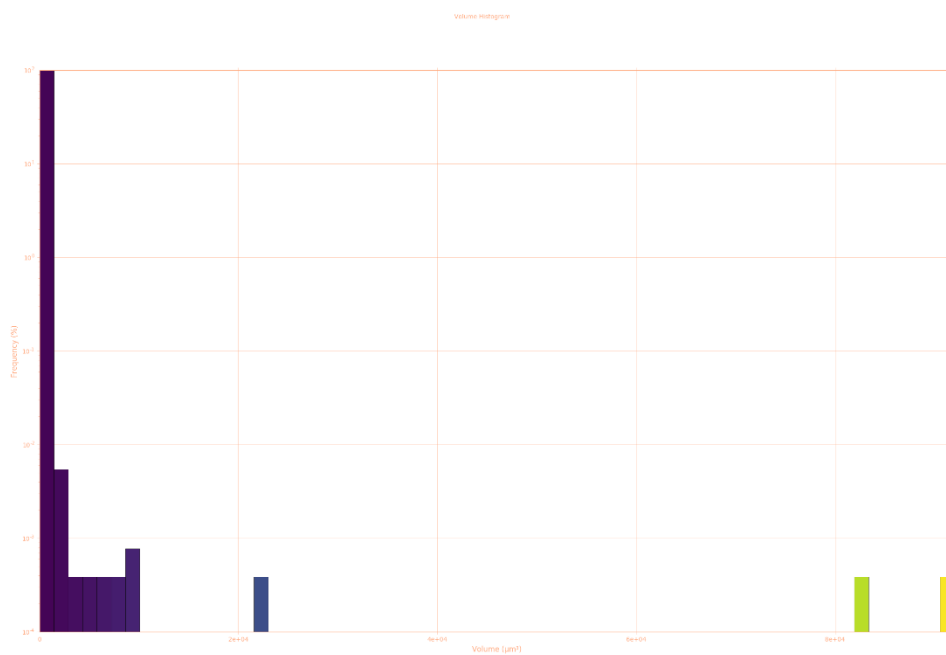

**Figure S3.** Volume distribution of pores in Orkot using 20× objective.

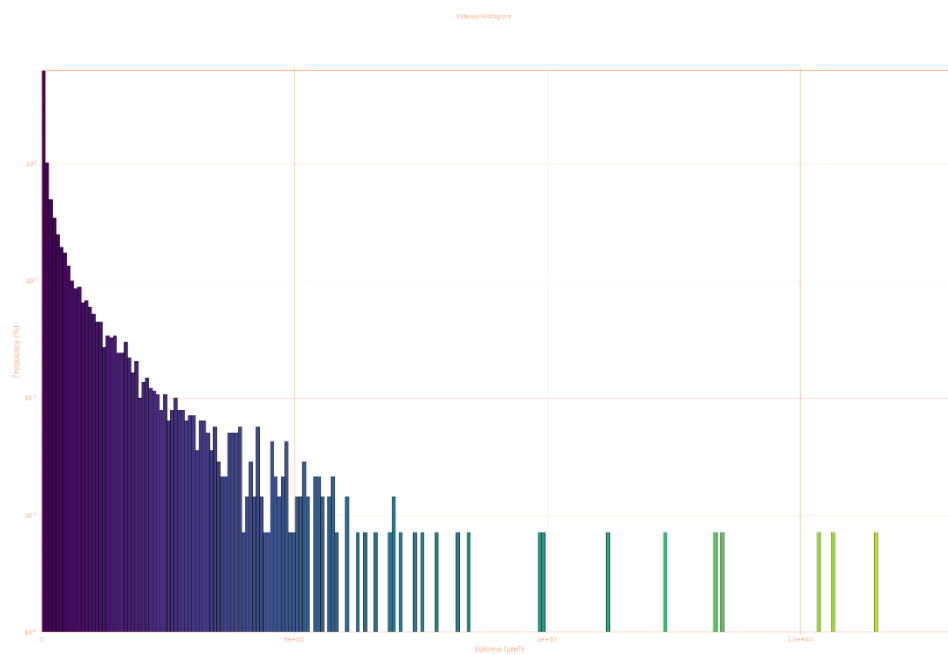

**Figure S4.** Volume distribution of MoS<sub>2</sub> particles in Orkot using 20× objective.

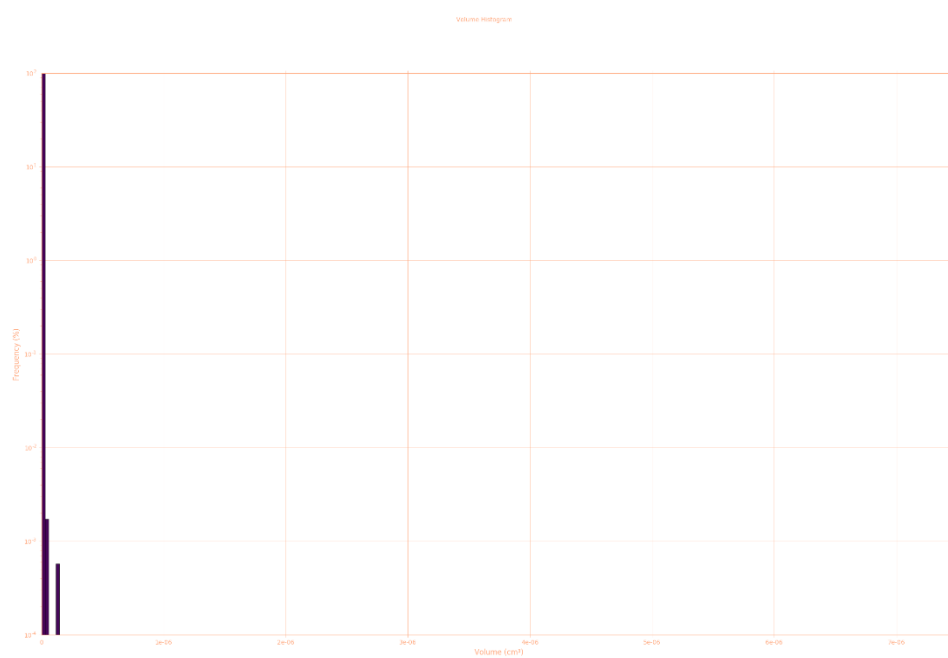

**Figure S5.** Volume distribution of CaCO<sub>3</sub> particles in Orkot using 20× objective.

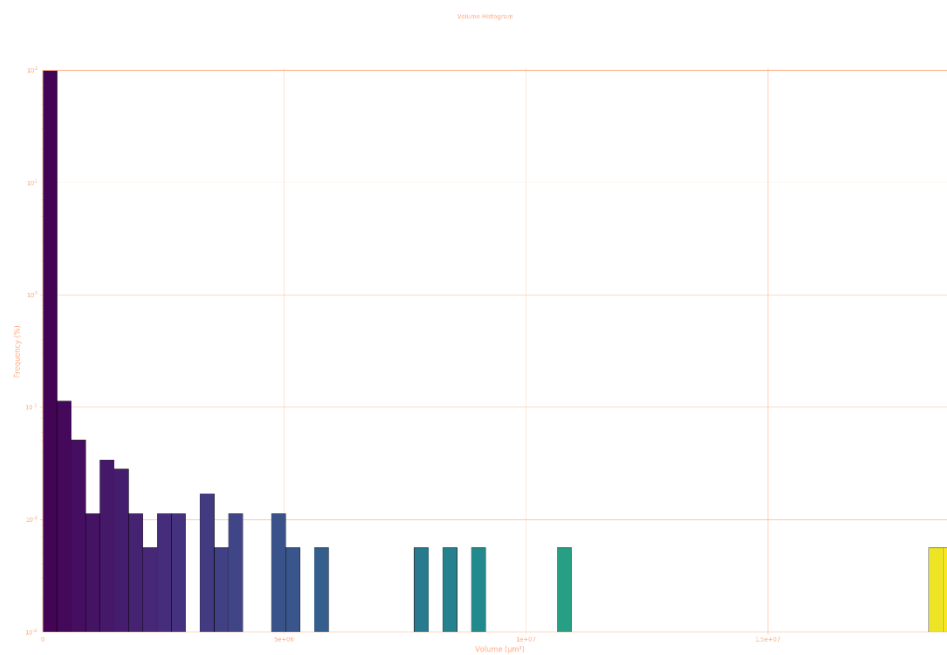

**Figure S6.** Volume distribution of pores in Orkot using 4× objective.
